# Supplementary figures and images for: Association between dyslipidemia and risk of type 2 diabetes mellitus in middle-aged and older Chinese adults: a secondary analysis of a nationwide cohort
Source: HighWire-hosted journal article supplement (doi:10.1136/bmjopen-2020-042821), 2021-05-01

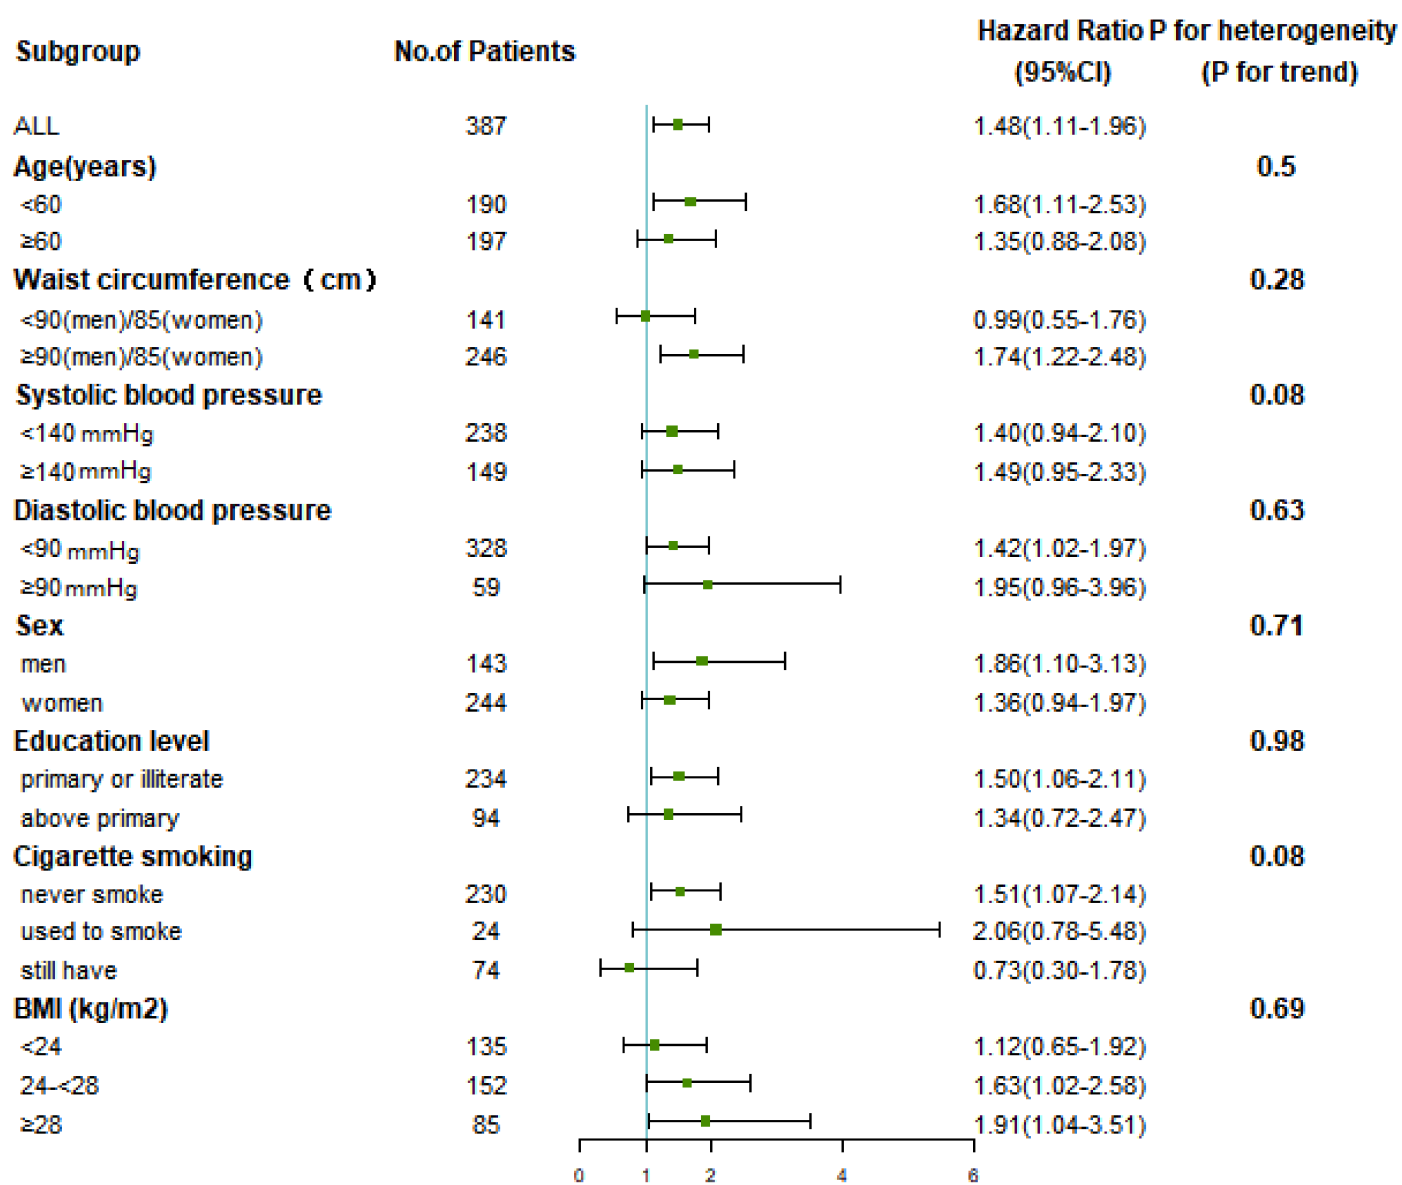

Supplement: bmjopen-2020-042821supp001_data_supplement.pdf [file bmjopen-2020-042821supp001_data_supplement.pdf]

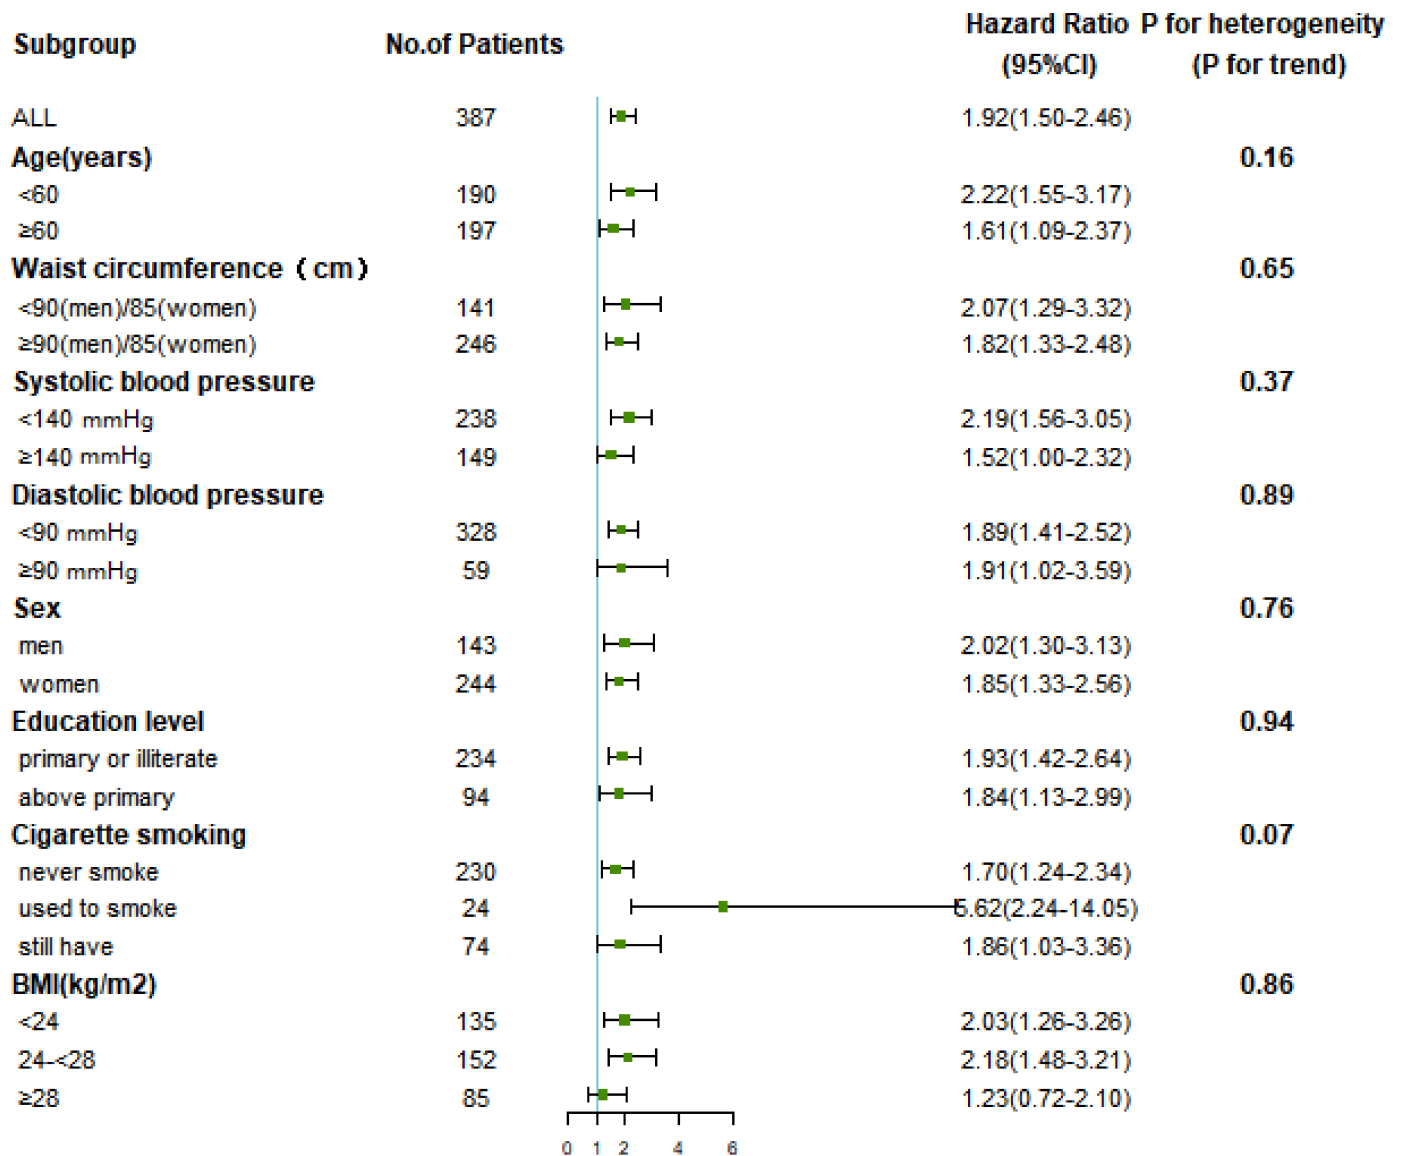

Supplement: bmjopen-2020-042821supp002_data_supplement.pdf [file bmjopen-2020-042821supp002_data_supplement.pdf]
